# Supplementary material for: Association between Age-Related Macular Degeneration and the Risk of Diabetes Mellitus: A Nationwide Cohort Study
Source: MDPI journal article supplement (doi:10.3390/biomedicines10102435), 2022-09-29
Supplement: s1 [file s1]

**Supplementary Table S1** Visual disability criteria of the Republic of Korea.

| Grade of Visual disability | Criteria                                                                                                      |
|----------------------------|---------------------------------------------------------------------------------------------------------------|
| 1 (most severe)            | $BCVA \leq 0.02$ in the better eye                                                                            |
| 2                          | $BCVA \leq 0.04$ in the better eye                                                                            |
| 3                          | 1) $BCVA \leq 0.06$ in the better eye, or 2) bilateral visual field < 5 degrees in all perspectives           |
| 4                          | 1) $BCVA \leq 0.1$ in the better eye, or 2) bilateral visual field < 10 degrees in all perspectives           |
| 5                          | 1) $BCVA \leq 0.2$ in the better eye, or 2) Decrease in bilateral visual field of 50% or more from the normal |
| 6 (least severe)           | $BCVA \leq 0.2$ in the worse eye                                                                              |

BCVA, Best-corrected visual acuity.
